# Supplementary material
Source: MDPI journal article supplement (https://www.mdpi.com/2076-3298/10/9/153)
Supplement: s1 [file s1]

| Haplotype | Name on the tree              | Species              | Accession number |
|-----------|-------------------------------|----------------------|------------------|
| 1         | <i>Chara altaica</i> AB560882 | <i>C. altaica</i>    | AB560882         |
| 2         | <i>C. altaica</i> MK786643    | <i>C. altaica</i>    | MK786643         |
|           | <i>C. canescens</i> AM710327  | <i>C. canescens</i>  | AM710327         |
|           |                               |                      | AM710323         |
|           |                               |                      | AM710322         |
|           |                               |                      | AM710321         |
|           |                               |                      | AM710320         |
|           |                               |                      | HF912654         |
|           |                               |                      | MK786639         |
|           |                               |                      | MK786629         |
|           |                               |                      | MK786628         |
|           |                               |                      | MK786627         |
|           |                               |                      | MK786626         |
|           |                               |                      | MK786625         |
|           |                               |                      | MK786624         |
|           |                               |                      | MK786623         |
| 3         | <i>C. aspera</i> HF912650     | <i>C. aspera</i>     | HF912650         |
|           |                               |                      | HF912645         |
|           |                               |                      | MK791474         |
|           | <i>C. galioides</i> MK791479  | <i>C. galioides</i>  | MK791479         |
| 4         | <i>C. neglecta</i> OQ607411   | <i>C. neglecta</i>   | OQ607411         |
|           | <i>C. neglecta</i> OQ607412   | <i>C. neglecta</i>   | OQ607412         |
| 5         | <i>C. aspera</i> MK770143     | <i>C. aspera</i>     | MK770143         |
| 6         | <i>C. australis</i> AY823700  | <i>C. australis</i>  | AY823700         |
| 7         | <i>C. baltica</i> HF912653    | <i>C. baltica</i>    | AB440260         |
|           |                               |                      | HF912653         |
|           | <i>C. hispida</i> HF912657    | <i>C. hispida</i>    | MK791475         |
|           | <i>C. horrida</i> HF912652    | <i>C. horrida</i>    | HF912657         |
|           | <i>C. papillosa</i> HF912656  | <i>C. papillosa</i>  | HF912652         |
|           | <i>C. aculeolata</i> AY170453 | <i>C. aculeolata</i> | HF912656         |
|           | <i>C. subspinoso</i> HF912655 | <i>C. subspinoso</i> | AY170453         |
| 8         | <i>C. braunii</i> AB440259    | <i>C. braunii</i>    | HF912655         |
| 9         | <i>C. braunii</i> MK791476    | <i>C. braunii</i>    | AB440259         |
| 10        | <i>C. braunii</i> KJ395929    | <i>C. braunii</i>    | MK791476         |
|           |                               |                      | KJ395929         |
|           |                               |                      | AB440258         |
|           |                               |                      | MG880206         |
|           |                               |                      | MG880205         |
|           |                               |                      | MG880204         |
|           |                               |                      | MG880203         |
|           |                               |                      | MG880202         |
|           |                               |                      | MG880201         |
|           |                               |                      | MG880200         |
|           |                               |                      | MG880199         |
|           |                               |                      | MG880198         |
|           |                               |                      | MG880197         |
|           | <i>C. brittonii</i> MG880206  | <i>C. brittonii</i>  | MG880196         |
|           |                               |                      | MG880195         |

|    |                               |                      |          |
|----|-------------------------------|----------------------|----------|
|    |                               |                      | MG880193 |
|    |                               |                      | MG880192 |
|    |                               |                      | MG880190 |
|    |                               |                      | MG880189 |
|    |                               |                      | MG880188 |
|    |                               |                      | MG880187 |
|    |                               |                      | MG880185 |
|    |                               |                      | MG880184 |
|    |                               |                      | MG880183 |
| 11 | <i>C. brittonii</i> MG880194  | <i>C. brittonii</i>  | MG880194 |
|    |                               |                      | MG880191 |
|    |                               |                      | MG880186 |
| 12 | <i>C. canescens</i> AM710330  | <i>C. canescens</i>  | AM710330 |
|    |                               |                      | AM710329 |
|    |                               |                      | AM710328 |
|    |                               |                      | AM710326 |
|    |                               |                      | AM710325 |
| 13 | <i>C. canescens</i> AM710324  | <i>C. canescens</i>  | AM710324 |
| 14 | <i>C. canescens</i> MK786642  | <i>C. canescens</i>  | MK786642 |
|    |                               |                      | MK786641 |
|    |                               |                      | MK786640 |
| 15 | <i>C. canescens</i> MK786638  | <i>C. canescens</i>  | MK786638 |
|    |                               |                      | MK786637 |
|    |                               |                      | MK786636 |
|    |                               |                      | MK786635 |
|    |                               |                      | MK786634 |
|    |                               |                      | MK786633 |
|    |                               |                      | MK786632 |
|    |                               |                      | MK786631 |
|    |                               |                      | MK786630 |
| 16 | <i>C. connivens</i> L13476    | <i>C. connivens</i>  | L13476   |
| 17 | <i>C. connivens</i> AF097162  | <i>C. connivens</i>  | AF097162 |
|    | <i>C. connivens</i> OQ607406  | <i>C. connivens</i>  | OQ607406 |
| 18 | <i>C. connivens</i> AF097161  | <i>C. connivens</i>  | AF097161 |
|    |                               |                      | AF097160 |
| 19 | <i>C. connivens</i> HF912648  | <i>C. connivens</i>  | HF912648 |
| 20 | <i>C. connivens</i> KX216499  | <i>C. connivens</i>  | KX216499 |
| 21 | <i>C. contraria</i> MH424122  | <i>C. contraria</i>  | MH424122 |
|    | <i>C. contraria</i> MK791477  | <i>C. contraria</i>  | MK791477 |
|    | <i>C. contraria</i> HF912659  | <i>C. contraria</i>  | HF912659 |
|    | <i>C. filiformis</i> HF912658 | <i>C. filiformis</i> | HF912658 |
| 22 | <i>C. contraria</i> MK770144  | <i>C. contraria</i>  | MK770144 |
| 23 | <i>C. contraria</i> MN793054  | <i>C. contraria</i>  | MN793054 |
| 24 | <i>C. corallina</i> AB359167  | <i>C. corallina</i>  | AB359167 |
| 25 | <i>C. drouetii</i> HQ380445   | <i>C. drouetii</i>   | HQ380445 |
| 26 | <i>C. drouetii</i> HQ380444   | <i>C. drouetii</i>   | HQ380444 |
| 27 | <i>C. fibrosa</i> AB359168    | <i>C. fibrosa</i>    | AB359168 |
|    | <i>C. gymnopitys</i> AB440261 | <i>C. gymnopitys</i> | AB440261 |
| 28 | <i>C. foliolosa</i> MG880213  | <i>C. foliolosa</i>  | MG880213 |
|    |                               |                      | HQ380448 |

|    |                                       |                              |                 |
|----|---------------------------------------|------------------------------|-----------------|
| 29 | <i>C. foliolosa</i> MG880212          | <i>C. foliolosa</i>          | MG880212        |
|    |                                       |                              | MG880210        |
|    |                                       |                              | HQ380452        |
|    |                                       |                              | HQ380449        |
| 30 | <i>C. foliolosa</i> MG880211          | <i>C. foliolosa</i>          | MG880211        |
|    |                                       |                              | MG880208        |
|    |                                       |                              | MG880207        |
|    |                                       |                              | HQ380451        |
|    |                                       |                              | HQ380447        |
|    |                                       |                              | HQ380446        |
| 31 | <i>C. foliolosa</i> MG880209          | <i>C. foliolosa</i>          | KY656911        |
|    |                                       |                              | MG880209        |
| 32 | <i>C. foliolosa</i> KY656914          | <i>C. foliolosa</i>          | HQ380450        |
|    |                                       |                              | KY656914        |
|    |                                       |                              | KY656915        |
| 33 | <i>C. foliolosa</i> KY656912          | <i>C. foliolosa</i>          | KY656907        |
| 34 | <i>C. galioides</i> MK791478          | <i>C. galioides</i>          | KY656912        |
| 35 | <i>C. globata</i> MN817125            | <i>C. globata</i>            | MN817125        |
|    |                                       |                              | MN817124        |
|    |                                       |                              | MN817123        |
|    |                                       |                              | MH424119        |
|    |                                       |                              | LM653114        |
|    |                                       |                              | LM653113        |
|    | <b><i>C. globata</i> OQ607413</b>     | <b><i>C. globata</i></b>     | <b>OQ607413</b> |
| 36 | <i>C. globata</i> MN273738            | <i>C. globata</i>            | MN273738        |
| 37 | <i>C. globularis</i> AB440250         | <i>C. globularis</i>         | AB440250        |
|    |                                       |                              | AB440249        |
|    |                                       |                              | AB440248        |
|    |                                       |                              | AB440247        |
|    |                                       |                              | AB440246        |
|    |                                       |                              | AB440245        |
|    |                                       |                              | AB440244        |
|    | <i>C. virgata</i> HF912649            | <i>C. virgata</i>            | HF912649        |
| 38 | <i>C. globularis</i> AF097165         | <i>C. globularis</i>         | AF097165        |
| 39 | <i>C. globularis</i> AF097164         | <i>C. globularis</i>         | AF097164        |
| 40 | <i>C. globularis</i> AF097163         | <i>C. globularis</i>         | AF097163        |
| 41 | <i>C. globularis</i> KX431010         | <i>C. globularis</i>         | KX431010        |
|    |                                       |                              | HF912647        |
|    | <i>C. leptospora</i> AB440251         | <i>C. leptospora</i>         | AB440251        |
|    |                                       |                              | AB440254        |
|    |                                       |                              | AB440253        |
| 42 | <i>C. guaiensis</i> KY656913          | <i>C. guaiensis</i>          | AB440252        |
|    | <i>C. martiana</i> HQ380467           | <i>C. martiana</i>           | KY656913        |
|    |                                       |                              | HQ380467        |
| 43 | <i>C. gymnophylla</i> MN793053        | <i>C. gymnophylla</i>        | HQ380466        |
| 44 | <i>C. gymnophylla</i> MN793052        | <i>C. gymnophylla</i>        | MN793053        |
| 45 | <b><i>C. gymnophylla</i> OQ607410</b> | <b><i>C. gymnophylla</i></b> | MN793052        |
|    | <b><i>C. gymnophylla</i> OQ607409</b> | <b><i>C. gymnophylla</i></b> | <b>OQ607410</b> |
|    |                                       |                              | <b>OQ607409</b> |

|    | <b><i>C. gymnophylla</i> OQ607408</b>                         | <b><i>C. gymnophylla</i></b>                         | <b>OQ607408</b> |
|----|---------------------------------------------------------------|------------------------------------------------------|-----------------|
| 46 | <i>C. haitensis</i> KY656908                                  | <i>C. haitensis</i>                                  | KY656908        |
| 47 | <i>C. haitensis</i> KX431011                                  | <i>C. haitensis</i>                                  | KX431011        |
| 48 | <i>C. haitensis</i> HQ380460                                  | <i>C. haitensis</i>                                  | HQ380460        |
|    |                                                               |                                                      | HQ380458        |
|    |                                                               |                                                      | HQ380457        |
|    |                                                               |                                                      | HQ380455        |
| 49 | <i>C. haitensis</i> HQ380459                                  | <i>C. haitensis</i>                                  | HQ380459        |
|    |                                                               |                                                      | HQ380456        |
|    |                                                               |                                                      | HQ380454        |
|    |                                                               |                                                      | HQ380453        |
| 50 | <i>C. hornemannii</i> KX431012                                | <i>C. hornemannii</i>                                | KX431012        |
| 51 | <i>C. hydropitys</i> KY656910                                 | <i>C. hydropitys</i>                                 | KY656910        |
| 52 | <i>C. hydropitys</i> HQ380464                                 | <i>C. hydropitys</i>                                 | HQ380464        |
|    |                                                               |                                                      | HQ380463        |
|    |                                                               |                                                      | HQ380462        |
|    |                                                               |                                                      | HQ380461        |
| 53 | <i>C. kenoyeri</i> HQ380465                                   | <i>C. kenoyeri</i>                                   | HQ380465        |
| 54 | <i>C. oryzae</i> MW987576                                     | <i>C. oryzae</i>                                     | MW987576        |
|    |                                                               |                                                      | MW987577        |
| 55 | <i>C. longifolia</i> AY170452                                 | <i>C. longifolia</i>                                 | AY170452        |
| 56 | <i>C. rusbyana</i> KY656909                                   | <i>C. rusbyana</i>                                   | KY656909        |
|    |                                                               |                                                      | KY630506        |
| 57 | <i>C. rusbyana</i> AF097169                                   | <i>C. rusbyana</i>                                   | AF097169        |
|    |                                                               |                                                      | AF097168        |
| 58 | <i>C. tenuispina</i> KU128741                                 | <i>C. tenuispina</i>                                 | KU128741        |
|    |                                                               |                                                      | KU128740        |
|    |                                                               |                                                      | KU128739        |
| 59 | <i>C. tenuispina</i> KU128738                                 | <i>C. tenuispina</i>                                 | KU128738        |
|    |                                                               |                                                      | KU128737        |
|    |                                                               |                                                      | KU128736        |
|    |                                                               |                                                      | KU128735        |
|    |                                                               |                                                      | KU128734        |
|    |                                                               |                                                      | KU128733        |
| 60 | <i>C. tomentosa</i> MH424123                                  | <i>C. tomentosa</i>                                  | MH424123        |
| 61 | <i>C. tomentosa</i> KJ395930                                  | <i>C. tomentosa</i>                                  | KJ395930        |
|    |                                                               |                                                      | HF912646        |
|    |                                                               |                                                      | AB440255        |
| 62 | <i>C. vulgaris</i> AF097167                                   | <i>C. vulgaris</i>                                   | AF097167        |
|    |                                                               |                                                      | AF097166        |
|    |                                                               |                                                      | MK529928        |
|    |                                                               |                                                      | AB440256        |
|    |                                                               |                                                      | DQ076300        |
|    |                                                               |                                                      | DQ076298        |
|    |                                                               |                                                      | KY449161        |
|    |                                                               |                                                      | HF912651        |
|    | <b><i>C. vulgaris</i> var. <i>longibracteata</i> OQ607407</b> | <b><i>C. vulgaris</i> var. <i>longibracteata</i></b> | <b>OQ607407</b> |
| 63 | <i>C. vulgaris</i> MN793055                                   | <i>C. vulgaris</i>                                   | MN793055        |
| 64 | <i>C. vulgaris</i> KX216498                                   | <i>C. vulgaris</i>                                   | KX216498        |

|    |                              |                     |          |
|----|------------------------------|---------------------|----------|
| 65 | <i>C. zeylanica</i> AB440257 | <i>C. zeylanica</i> | AB440257 |
| 66 | <i>C. zeylanica</i> AY720934 | <i>C. zeylanica</i> | AY720934 |
| 67 | <i>C. zeylanica</i> DQ076299 | <i>C. zeylanica</i> | DQ076299 |
| 68 | <i>C. zeylanica</i> HQ380481 | <i>C. zeylanica</i> | HQ380481 |
|    |                              |                     | HQ380478 |
|    |                              |                     | HQ380476 |
| 69 | <i>C. zeylanica</i> HQ380480 | <i>C. zeylanica</i> | HQ380480 |
|    |                              |                     | HQ380479 |
|    |                              |                     | HQ380477 |
|    |                              |                     | HQ380475 |
|    |                              |                     | HQ380474 |
|    |                              |                     | HQ380473 |
|    |                              |                     | HQ380472 |
|    |                              |                     | HQ380471 |
|    |                              |                     | HQ380469 |
|    |                              |                     | HQ380468 |
|    |                              |                     | AB359169 |
|    |                              |                     | KT343913 |
|    |                              |                     | KT343914 |
|    |                              |                     | MZ648319 |
|    |                              |                     | MZ648320 |
|    |                              |                     | MZ648321 |
| 70 | <i>C. zeylanica</i> HQ380470 | <i>C. zeylanica</i> | HQ380470 |
| 71 | <i>C. lipkinii</i> MW659838  | <i>C. lipkinii</i>  | MW659838 |
|    |                              |                     | MW659839 |
|    |                              |                     | MW659840 |
|    |                              |                     | MW659841 |
|    |                              |                     | MW659842 |
| 72 | <i>C. denudata</i> ON502384  | <i>C. denudata</i>  | ON502384 |
| 73 | <i>C. dissoluta</i> OP919049 | <i>C. dissoluta</i> | OP919049 |
